# Supplementary material
Source: Springer Nature journal article supplement (https://www.springermedizin.de/resource/supplementary/12885_2014_5022_MOESM2_ESM.pdf/9467702)

# OS by BMI Group

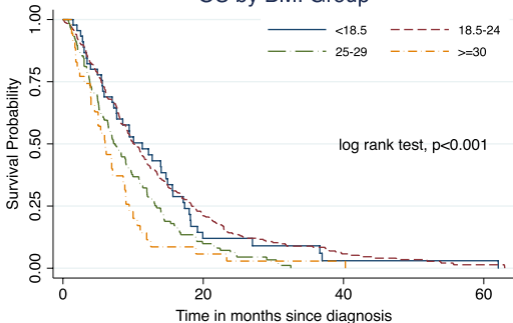

Number at risk

|           |     |    |    |   |
|-----------|-----|----|----|---|
| <18.5     | 45  | 5  | 1  | 1 |
| 18.5-24   | 286 | 54 | 10 | 2 |
| 25-29     | 117 | 11 | 0  | 0 |
| $\geq 30$ | 35  | 2  | 1  | 0 |

Supplement: MOESM2 [file 9467702]
